# Supplementary material
Source: MDPI journal article supplement (https://www.mdpi.com/2227-9717/10/3/577)
Supplement: s1 [file s1]

Taking 1-Chloropropane as an example, its topological index S is calculated as follows:

1. Numbering the atoms (except for hydrogen atoms) in molecular structure according to IUPAC systems.

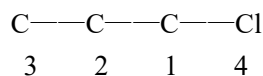

2. Constructing the distance matrix  $D_w$ :

$$D_w = \begin{bmatrix} 0 & 1 & 2 & 1 \\ 1 & 0 & 1 & 2 \\ 2 & 1 & 0 & 3 \\ 1 & 2 & 3 & 0 \end{bmatrix}$$

The interatomic bond distance is set as follows: single bond, 1; double bond, 2; triple bond, 3; aromatic bond, 1.5, the  $a_{ij}$  in the matrix represents the overall distance between atom  $i$  and  $j$ .

3. Constructing the vertex weights matrix  $D_v$ :

$$D_v = \begin{bmatrix} 1 & 0 & 0 & 0 \\ 0 & 1 & 0 & 0 \\ 0 & 0 & 1 & 0 \\ 0 & 0 & 0 & 12 \end{bmatrix}$$

Vertex weights ( $V$ ) are based on the atomic numbers of the vertices. The algorithm is  $V = 1 +$  (atomic no. of heteroatom – atomic no. of carbon). Thus, the vertex weights for the seven reactive elements of the second quantum level of the periodic chart are as follows: Li, -2; Be, -1; B, 0; C, 1; N, 2; O, 3; F, 4. The vertex weights matrix utilizes only its principal diagonal to record the  $V$  data.

4. Constructing the valency matrix  $D_v$  and valency vector  $v$ :

$$D_v = \begin{bmatrix} 2 & 0 & 0 & 0 \\ 0 & 2 & 0 & 0 \\ 0 & 0 & 1 & 0 \\ 0 & 0 & 0 & 4 \end{bmatrix}$$

$$v = [2, 2, 1, 4]$$

The edge count about each hydrogen-suppressed vertex supplied a portion of the valence information. The algorithm is  $v$  = edge count about each hydrogen-suppressed vertex. For those heteratoms lying to the left of carbon in the periodic chart, each missing electron pair contributed -1 to the total valence of the heteroatom. Thus, all the heteroatoms in the second quantum level connected by a single bond to one carbon atom had the  $v$  numbers: Li, -2; Be, -1; B, 0; N, 2; O, 3; F, 4.

So the topological index of 1-Chloropropane is calculated as follows:

$$D_v D_w = D_v D_v D_w = \begin{bmatrix} 0 & 2 & 4 & 2 \\ 2 & 0 & 2 & 4 \\ 2 & 1 & 0 & 3 \\ 48 & 96 & 144 & 0 \end{bmatrix}$$

$$MTI' = \sum_{i=1}^N (v D_v D_w)_i = \sum_{i=1}^N \left( [2, 2, 1, 4] * \begin{bmatrix} 0 & 2 & 4 & 2 \\ 2 & 0 & 2 & 4 \\ 2 & 1 & 0 & 3 \\ 48 & 96 & 144 & 0 \end{bmatrix} \right) = 1190$$

$$GM = 0$$

$$S = MTI' + GM = 1190$$

5. Geometric modification number (GM)

The geometries about a pair of vertices responsible for geometric isomerism were indicated by geometric factors (GF) of +1 and +1 for Z (cis) geometry, and -1, -1 for E (trans) geometry. All other vertices in the graph were assigned GF values of zero. Those factors were used to quantify

the geometric isomerism of a given compound. Taking 1,2-Difluoroethene as an example:

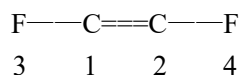

$$D_w = \begin{bmatrix} 0 & 2 & 1 & 3 \\ 2 & 0 & 3 & 1 \\ 1 & 3 & 0 & 4 \\ 3 & 1 & 4 & 0 \end{bmatrix}, D_v = \begin{bmatrix} 1 & 0 & 0 & 0 \\ 0 & 1 & 0 & 0 \\ 0 & 0 & 4 & 0 \\ 0 & 0 & 0 & 4 \end{bmatrix}, D_v = \begin{bmatrix} 3 & 0 & 0 & 0 \\ 0 & 3 & 0 & 0 \\ 0 & 0 & 4 & 0 \\ 0 & 0 & 0 & 4 \end{bmatrix}$$

$$D_{vVw} = D_v D_V D_w = \begin{bmatrix} 0 & 6 & 3 & 9 \\ 6 & 0 & 9 & 3 \\ 16 & 48 & 0 & 64 \\ 48 & 16 & 64 & 0 \end{bmatrix}$$

$$\text{MTI}' = \sum_{i=1}^N (v D_{vVw})_i = \sum_{i=1}^N \left( [3, 3, 4, 4] * \begin{bmatrix} 0 & 6 & 3 & 9 \\ 6 & 0 & 9 & 3 \\ 16 & 48 & 0 & 64 \\ 48 & 16 & 64 & 0 \end{bmatrix} \right) = 1132$$

$$M_{GF,Z} = \begin{bmatrix} +1 & 0 & 0 & 0 \\ 0 & +1 & 0 & 0 \\ 0 & 0 & 0 & 0 \\ 0 & 0 & 0 & 0 \end{bmatrix}, M_{GF,E} = \begin{bmatrix} -1 & 0 & 0 & 0 \\ 0 & -1 & 0 & 0 \\ 0 & 0 & 0 & 0 \\ 0 & 0 & 0 & 0 \end{bmatrix}$$

$$\text{GM}_Z = \sum_{i=1}^N M_{GF,Z} (D_{vVw} + D_{vVw}^T) = 176$$

$$\text{GM}_E = \sum_{i=1}^N M_{GF,E} (D_{vVw} + D_{vVw}^T) = -176$$

The GM number for (Z)-1,2-Difluoroethene is added to the MTI' value of 1132, the sum is the S index for (Z)-1,2-Difluoroethene, 1308. The S index for (E)-1,2-Difluoroethene is attained in the same manner: S = 1132-176 = 956.

Table S1 shows the topological indices of all 155 working fluids in this research.

| Table S1 Topological indices of working fluids |      |                                 |
|------------------------------------------------|------|---------------------------------|
| Name                                           | S    | Formula                         |
| Methane                                        | 0    | CH <sub>4</sub>                 |
| Fluoromethane                                  | 65   | CH <sub>3</sub> F               |
| Difluoromethane                                | 392  | CH <sub>2</sub> F <sub>2</sub>  |
| Trifluoromethane                               | 987  | CHF <sub>3</sub>                |
| Tetrafluoromethane                             | 1856 | CF <sub>4</sub>                 |
| Iodomethane                                    | 769  | CH <sub>3</sub> I               |
| Bromomethane                                   | 481  | CH <sub>3</sub> Br              |
| Dibromomethane                                 | 2888 | CH <sub>2</sub> Br <sub>2</sub> |

|                                        |       |          |
|----------------------------------------|-------|----------|
| Chloromethane                          | 193   | CH3Cl    |
| Dichloromethane                        | 1160  | CH2Cl2   |
| Trichloromethane                       | 2907  | CHCl3    |
| Tetrachloromethane                     | 5440  | CCl4     |
| Bromodifluoromethane                   | 3067  | CHBrF2   |
| Bromochlorodifluoromethane             | 5664  | CBrClF2  |
| Bromotrifluoromethane                  | 4768  | CBrF3    |
| Iodotrifluoromethane                   | 6784  | CF3I     |
| Chlorofluoromethane                    | 776   | CH2ClF   |
| Chlorodifluoromethane                  | 1627  | CHClF2   |
| Chlorotrifluoromethane                 | 2752  | CClF3    |
| Dichlorofluoromethane                  | 2267  | CHCl2F   |
| Dichlorodifluoromethane                | 3648  | CCl2F2   |
| Trichlorofluoromethane                 | 4544  | CCl3F    |
| Ethane                                 | 2     | C2H6     |
| Chloroethane                           | 587   | C2H5Cl   |
| Fluoroethane                           | 203   | C2H5F    |
| 1,1-Difluoroethane                     | 672   | C2H4F2   |
| 1,1,1-Trifluoroethane                  | 1415  | C2H3F3   |
| 1,1,2-Trifluoroethane                  | 1669  | C2H3F3   |
| 1,1,1,2-Tetrafluoroethane              | 2816  | C2H2F4   |
| 1,1,2,2-Tetrafluoroethane              | 2942  | C2H2F4   |
| Pentafluoroethane                      | 4497  | C2HF5    |
| Hexafluoroethane                       | 6464  | C2F6     |
| Bromoethane                            | 1451  | C2H5Br   |
| 1-Chloro-1,1-difluoroethane            | 2311  | C2H3ClF2 |
| Chloropentafluoroethane                | 8512  | C2ClF5   |
| 1,1-Dichloro-1-fluoroethane            | 3207  | C2H3Cl2F |
| 1,1-Dichloro-1,2,2,2-tetrafluoroethane | 10560 | C2Cl2F4  |
| 2,2-Dichloro-1,1,1-trifluoroethane     | 8080  | C2HCl2F3 |
| 1,2-Dichloro-1,1,2,2-tetrafluoroethane | 10560 | C2Cl2F4  |
| 1,1,1-Trichloroethane                  | 4103  | C2H3Cl3  |
| 1,1,2,2-Tetrachloro-1,2-difluoroethane | 14656 | C2Cl4F2  |
| 1,1,1,2-Tetrachloro-2,2-difluoroethane | 14656 | C2Cl4F2  |
| 1,1,2-Trichlorotrifluoroethane         | 12608 | C2Cl3F3  |
| 2-Chloro-1,1,1,2-tetrafluoroethane     | 6289  | C2HClF4  |
| 1,2-Dibromotetrafluoroethane           | 19776 | C2Br2F4  |
| Propane                                | 14    | C3H8     |
| 1-Bromopropane                         | 2918  | C3H7Br   |
| 1-Chloropropane                        | 1190  | C3H7Cl   |
| 2-Chloropropane                        | 997   | C3H7Cl   |
| 2-Fluoropropane                        | 357   | C3H7F    |
| 1,1,1,3,3-Pentafluoropropane           | 6382  | C3H3F5   |
| 1,1,2,2,3-Pentafluoropropane           | 5956  | C3H3F5   |

|                                     |        |           |
|-------------------------------------|--------|-----------|
| 1,1,1,2,2,3-Hexafluoropropane       | 8276   | C3H2F6    |
| 1,1,1,2,3,3-Hexafluoropropane       | 8741   | C3H2F6    |
| 1,1,1,3,3,3-Hexafluoropropane       | 8984   | C3H2F6    |
| 1,1,1,2,3,3,3-Heptafluoropropane    | 11751  | C3HF7     |
| Perflutren                          | 14816  | C3F8      |
| 1,2-Dichloro-1,1,2-trifluoropropane | 9552   | C3H3Cl2F3 |
| Butane                              | 44     | C4H10     |
| Isobutane                           | 42     | C4H10     |
| 1,1,1,2,2,3,3,4-Octafluorobutane    | 17636  | C4H2F8    |
| 1,1,1,2,2,4,4,4-Octafluorobutane    | 19052  | C4H2F8    |
| 1,1,1,2,2,3,3,4,4-Nonafluorobutane  | 22542  | C4HF9     |
| Perflubutane                        | 27776  | C4F10     |
| 1-Methoxybutane                     | 278    | C5H12O    |
| Vinyl butyl ether                   | 627    | C6H12O    |
| 2,2-Dimethylbutane                  | 170    | C6H14     |
| 2,3-Dimethylbutane                  | 170    | C6H14     |
| 2,2,3-Trimethylbutane               | 276    | C7H16     |
| Pentane                             | 100    | C5H12     |
| Isopentane                          | 94     | C5H12     |
| Neopentane                          | 92     | C5H12     |
| 2-Methylpentane                     | 182    | C6H14     |
| 3-Methylpentane                     | 172    | C6H14     |
| 2,2-Dimethylpentane                 | 296    | C7H16     |
| 2,4-Dimethylpentane                 | 302    | C7H16     |
| 3,3-Dimethylpentane                 | 274    | C7H16     |
| 3-Ethylpentane                      | 276    | C7H16     |
| 2,2,3-Trimethylpentane              | 424    | C8H18     |
| 2,2,4-Trimethylpentane              | 460    | C8H18     |
| 2,3,3-Trimethylpentane              | 412    | C8H18     |
| 2,3,4-Trimethylpentane              | 426    | C8H18     |
| 3-Ethyl-2-methylpentane             | 416    | C8H18     |
| 3-Ethyl-3-methylpentane             | 404    | C8H18     |
| Hexane                              | 190    | C6H14     |
| Perflexane                          | 71488  | C6F14     |
| 2-Methylhexane                      | 314    | C7H16     |
| 3-Methylhexane                      | 298    | C7H16     |
| 2,2-Dimethylhexane                  | 478    | C8H18     |
| 2,5-Dimethylhexane                  | 488    | C8H18     |
| 3,3-Dimethylhexane                  | 434    | C8H18     |
| Heptane                             | 322    | C7H16     |
| Perfluoroheptane                    | 104984 | C7F16     |
| 2-Methylheptane                     | 498    | C8H18     |
| 3-Methylheptane                     | 468    | C8H18     |
| 4-Methylheptane                     | 458    | C8H18     |

|                                   |        |         |
|-----------------------------------|--------|---------|
| Octane                            | 504    | C8H18   |
| Perfluorooctane                   | 142976 | C8F18   |
| Ethylene                          | 16     | C2H4    |
| Fluoroethylene                    | 303    | C2H3F   |
| 1,1-Difluoroethylene              | 864    | C2H2F2  |
| 2-Chloro-1,1-difluoroethylene     | 3777   | C2HClF2 |
| 1-Chloro-1,2,2-trifluoroethene    | 5696   | C2ClF3  |
| 1,1-Dichloroethene                | 2400   | C2H2Cl2 |
| Tetrafluoroethylene               | 3904   | C2F4    |
| (Z)-1,2-Dichloroethene            | 3846   | C2H2Cl2 |
| (E)-1,2-Dichloroethene            | 2838   | C2H2Cl2 |
| Ethoxyethylene                    | 255    | C4H8O   |
| Propylene                         | 51     | C3H6    |
| 3-Chloro-1-propene                | 1445   | C3H5Cl  |
| 3,3,3-Trifluoropropene            | 2373   | C3H3F3  |
| (E)-1,2,3,3-Tetrafluoropropene    | 4604   | C3H2F4  |
| 2,3,3,3-Tetrafluoropropene        | 4032   | C3H2F4  |
| (Z)-1,3,3,3-Tetrafluoropropene    | 5460   | C3H2F4  |
| (E)-1,3,3,3-Tetrafluoropropene    | 4520   | C3H2F4  |
| 1,1,3,3,3-Pentafluoropropene      | 7911   | C3HF5   |
| (Z)-1,2,3,3,3-Pentafluoropropene  | 7758   | C3HF5   |
| (E)-1,2,3,3,3-Pentafluoropropene  | 6636   | C3HF5   |
| Isobutylene                       | 108    | C4H8    |
| 1,2-Propadiene                    | 112    | C3H4    |
| 1-Butene                          | 108    | C4H8    |
| (Z)-2-Butene                      | 180    | C4H8    |
| (E)-2-Butene                      | 68     | C4H8    |
| 2-Methyl-1-butene                 | 191    | C5H10   |
| 2-Methyl-2-butene                 | 225    | C5H10   |
| 3-Methyl-1-butene                 | 187    | C5H10   |
| Hexafluoro-1,3-butadiene          | 15680  | C4F6    |
| 1,3-Butadiene                     | 188    | C4H6    |
| 1-Pentene                         | 199    | C5H10   |
| (Z)-2-Pentene                     | 305    | C5H10   |
| (E)-2-Pentene                     | 141    | C5H10   |
| 4-Methyl-1-pentene                | 318    | C6H12   |
| 1-Hexene                          | 332    | C6H12   |
| 1,5-Hexadiene                     | 490    | C6H10   |
| 1-Heptene                         | 515    | C7H14   |
| 1-Octene                          | 1036   | C8H16   |
| Dimethyl ether                    | 30     | C2H6O   |
| 1,1,3,3-Tetrafluorodimethyl ether | 4414   | C2H2F4O |
| Pentafluorodimethyl ether         | 6576   | C2HF5O  |
| trifluoro(methoxy)methane         | 2124   | C2H3F3O |

|                                                   |       |         |
|---------------------------------------------------|-------|---------|
| Pentafluoroethyl methyl ether                     | 6766  | C3H3F5O |
| 2-(Difluoromethoxy)-1,1,1-trifluoroethane         | 8784  | C3H3F5O |
| 1,1,1-Trifluoro-2-(trifluoromethoxy)ethane        | 14128 | C3H2F6O |
| Dimethoxymethane                                  | 212   | C3H8O2  |
| Heptafluoroisopropyl methyl ether                 | 15420 | C4H3F7O |
| Heptafluoro-1-methoxypropane                      | 14190 | C4H3F7O |
| 1,1,1,2,2-Pentafluoro-3-(trifluoromethoxy)propane | 24124 | C4H2F8O |
| Ethoxyethane                                      | 148   | C4H10O  |
| 1,2-Dimethoxyethane                               | 366   | C4H10O2 |
| Methyl tert-butyl ether                           | 234   | C5H12O  |
| 2,2-Dimethoxypropane                              | 450   | C5H12O2 |
| Ethyl propyl ether                                | 278   | C5H12O  |
| Tert-Butyl ethyl ether                            | 376   | C6H14O  |
| Dipropyl ether                                    | 418   | C6H14O  |
